# Supplementary material for: The novel RacE-binding protein GflB sharpens Ras activity at the leading edge of migrating cells
Source: PubMed Central journal article supplement — Mol Biol Cell. 2016 May 15;27(10):1596–605. doi: 10.1091/mbc.E15-11-0796 (PMC4865317; doi:10.1091/mbc.e15-11-0796), 2016-05-15
Supplement: supp_E15-11-0796v1_CombinedSupMats.pdf [file supp_E15-11-0796v1_CombinedSupMats.pdf]

# Supplemental Materials

*Molecular Biology of the Cell*

Senoo et al.



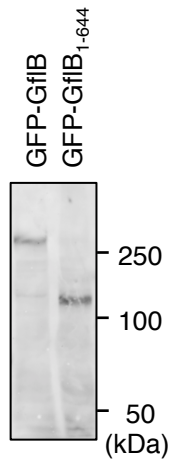

Figure S2. Whole-cell lysates analyzed using immunoblotting with anti-GFP antibodies to detect the indicated PTEN-GFP fusions.

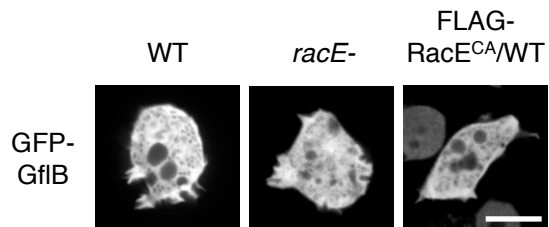

Figure S3. GFP-Gf1B was examined in WT cells, *racE*<sup>-</sup> cells, and WT cells expressing constitutively active RacE<sub>G20V</sub> using fluorescence microscopy. Bar, 10  $\mu$ m.

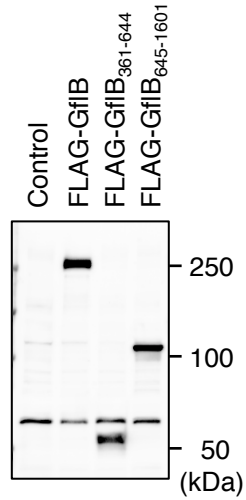

Figure S4. Whole-cell lysates analyzed using immunoblotting with anti-FLAG antibodies.

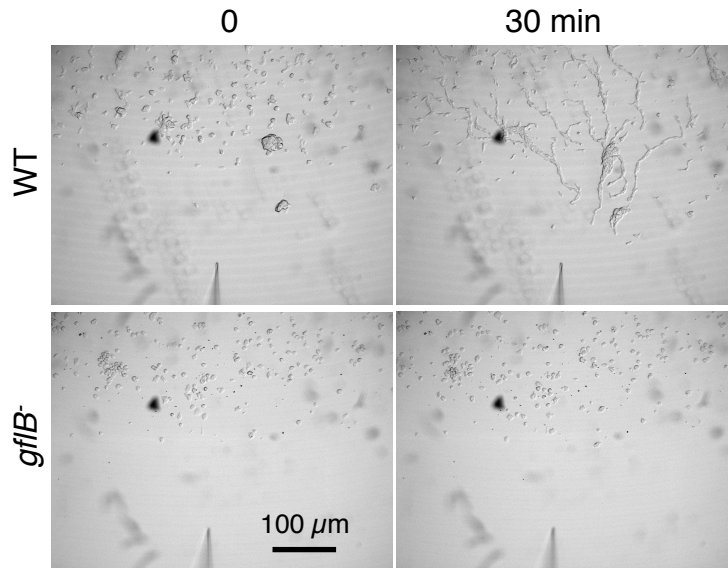

Figure S5. After 8 hours starvation, WT and *gflB*<sup>-</sup> cells were placed in a chemoattractant gradient generated by a micropipette that released cAMP and observed for 20 min using phase contrast microscopy.

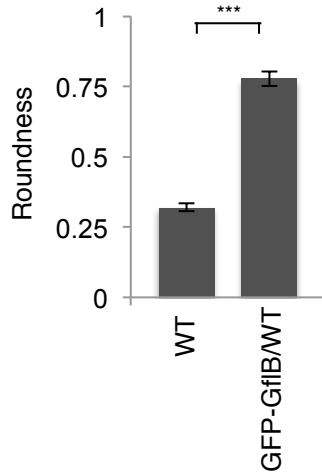

Figure S6. Roundness was determined by calculating the ratio between the short axis ( $A_s$ ) and long axis ( $A_l$ ) of cells ( $A_s/A_l$ ) in WT cells in the presence or absence of GFP-GfIB expression. Values represent mean  $\pm$  SEM. At least 30 cells were analyzed for each group.

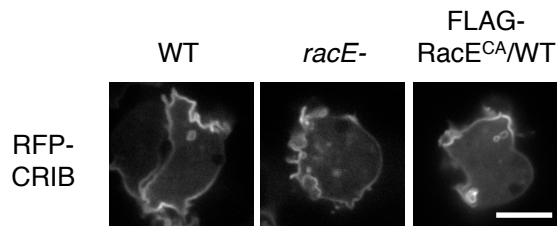

Figure S7. CRIB-RFP was examined in WT cells, *racE*<sup>-</sup> cells, and WT cells expressing constitutively active RacE<sub>G20V</sub> using fluorescence microscopy. Bar, 10  $\mu$ m.

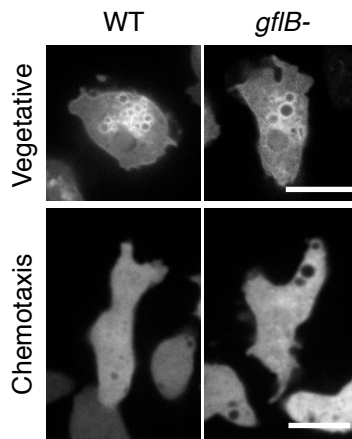

Figure S8. The PS biosensor GFP-LactC2 was observed in WT and *gflB*<sup>-</sup> cells during growth (vegetative) and after differentiation (chemotaxis).

Table S1. Plasmids used in this study

| <b>Plasmids</b>                        | <b>Primers used</b> | <b>Drug for selection</b> | <b>References</b>              |
|----------------------------------------|---------------------|---------------------------|--------------------------------|
| <b><i>Dictyostelium</i> expression</b> |                     |                           |                                |
| pJK1-GFP: pIS1                         |                     | G418 (20 µg/ml)           | Zhang et.al. (2011)            |
| pJK1-GFP- <i>racIA</i>                 | 10 11               | G418 (20 µg/ml)           | This Study                     |
| pJK1-GFP- <i>racB</i>                  | 12 13               | G418 (20 µg/ml)           | This Study                     |
| pJK1-GFP- <i>racE</i>                  |                     | G418 (20 µg/ml)           | Wang et.al. (2013)             |
| pJK1-GFP- <i>racE</i> (G20V)           |                     | G418 (20 µg/ml)           | Wang et.al. (2013)             |
| pJK1-GFP- <i>racE</i> (T25N)           |                     | G418 (20 µg/ml)           | Wang et.al. (2013)             |
| pDRH-FLAG- <i>RasC</i>                 |                     | Hygromycin (50 µg/ml)     | Gift from Dr. Devreotes (JHMI) |
| pDRH-FLAG- <i>RasG</i>                 |                     | Hygromycin (50 µg/ml)     | Gift from Dr. Devreotes (JHMI) |
| pDRH- <i>LimE</i> Δ <i>coli</i> -mRFP  |                     | Hygromycin (50 µg/ml)     | Gift from Dr. Devreotes (JHMI) |
| pDM323-RBD( <i>Raf</i> )-GFP           |                     | G418 (20 µg/ml)           | Xiong et.al. (2010)            |
| pDRH-PH <i>crac</i> -RFP               |                     | Hygromycin (50 µg/ml)     | Gift from Dr. Devreotes (JHMI) |
| pTX-GFP                                |                     | G418 (20 µg/ml)           | Levi et.al. (2000)             |
| pTX-GFP-GfIB                           | 14 15               | G418 (20 µg/ml)           | This Study                     |
| pTX-GFP-GfIB 1-644                     | 14 16               | G418 (20 µg/ml)           | This Study                     |
| pTX-GFP-GfIB 361-644                   | 16 17               | G418 (20 µg/ml)           | This Study                     |
| pTX-GFP-GfIB 645-1601                  | 15 18               | G418 (20 µg/ml)           | This Study                     |
| pTX-FLAG                               |                     | G418 (20 µg/ml)           | Levi et.al. (2000)             |
| pTX-FLAG-GfIB                          | 14 15               | G418 (20 µg/ml)           | This Study                     |
| pTX-FLAG-GfIB 361-644                  | 16 17               | G418 (20 µg/ml)           | This Study                     |
| pTX-FLAG-GfIB 645-1601                 | 15 18               | G418 (20 µg/ml)           | This Study                     |
| pDRH-CRIB-RFP                          | 19 20               | Hygromycin (50 µg/ml)     | This Study                     |
| <b><i>Bacterial</i> expression</b>     |                     |                           |                                |
| pGEX 4T-1                              |                     |                           | Amersham                       |
| pGEX-Byr2-RBD                          |                     |                           | Kae et.al. (2004)              |

Table S2. Primers used in this study

**Primers for gene disruption in Dictyostelium cells**

|   |                     |                                 |
|---|---------------------|---------------------------------|
| 1 | A15P                | CCAACCCAAGTTTTTTTAAACC          |
| 2 | gflB-2              | GACTCGAGTTATTCGGCATTGTTGAAGGAAC |
| 3 | gflB-3              | GTGTACCAAATTTCTCTATACTTCG       |
| 4 | gflB-4              | CACCACCACTACCTCAACTACAACC       |
| 5 | gflB-5              | GAGCGGCCGCGTTGTAGTACTACTAGTTAC  |
| 6 | gflB salI 1-19      | GAGTCGACATGACAGATTTAAATTCAG     |
| 7 | gflB smaI 800-781   | GACCCGGGAATTGATTAGCCTGTAAAAC    |
| 8 | gflB smaI 4116-4134 | GACCCGGGAATCATCAGAATTGGAGAC     |
| 9 | gflB NotI 4875-4856 | GAGCGGCCGCGTTGTAGTACTACTAGTTAC  |

**Primers for expression plasmids in Dictyostelium cells**

|    |                |                                     |
|----|----------------|-------------------------------------|
| 10 | rac1A-1        | GGAAGATCTTCCATGCAAGCAATTAATG        |
| 11 | rac1A-2        | GGAAGATCTTCCTTATAAAATGTTGC          |
| 12 | racB-1         | GGAAGATCTTCCATGCAATCAATTAATTGG      |
| 13 | racB-2         | GGAAGATCTTCCTTATAAAATTGAACATTTTG    |
| 14 | gflB-Start     | CCCGAGCTCATGACAGATTTAAATTC          |
| 15 | gflB-Stop      | CCCCTCGAGTTATTCGGCATTGTTGAAGGAAC    |
| 16 | gflB 1932-1909 | GACTCGAGTTAATATGGTGAATCTAAAATTTGTTG |
| 17 | gflB 1081-1101 | GAGAGCTCTTACAAGTAGTTTCCAATGCC       |
| 18 | gflB 2042-2066 | GAGAGCTCGGAATTTATGGTGTAGATTAACAC    |
| 19 | CRIB 943       | CCCGAGCTCACTACATCACCACCATCC         |
| 20 | CRIB 1233      | CCCCTCGAGTTAATGGAAATCTAAAACATC      |
